# Supplementary material
Source: PubMed Central journal article supplement (PMC3594289)
Supplement: rna-10-314-s01.pdf [file rna-10-314-s01.pdf]

## **Supplemental Material to:**

**Nicolas Cougot, Anne-Elisabeth Molza, Emmanuel Giudice,  
Annie Cavalier, Daniel Thomas and Reynald Gillet**

**Structural organization of the polysomes adjacent  
to mammalian processing bodies (P-bodies)**

**2013; 10(2)**

**<http://dx.doi.org/10.4161/rna.23342>**

**<http://www.landesbioscience.com/journals/rna/article/23342>**

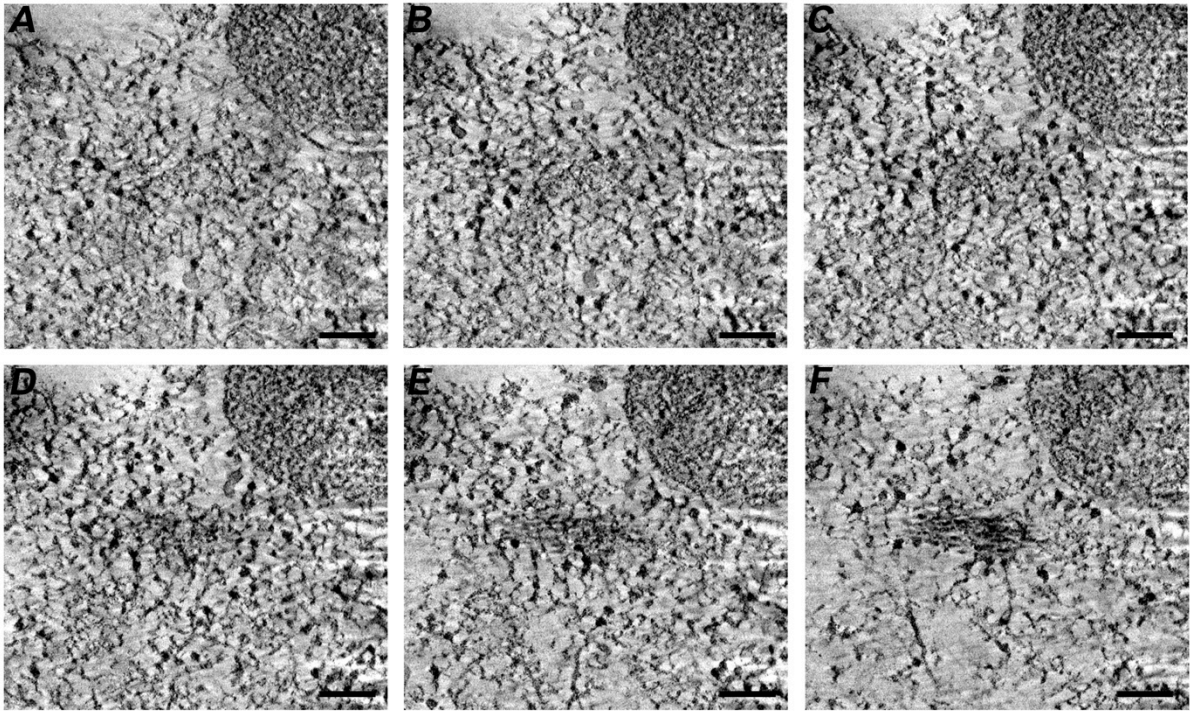

**Supplementary Figure S1:** Digital slices through the 3D density map of the human P-body “tomogram 1” presented in Figure 1A and B. Each digital slice corresponds to an average over 10 consecutive sections, thus improving the signal-to-noise ratio. Scale bar: 100nm.

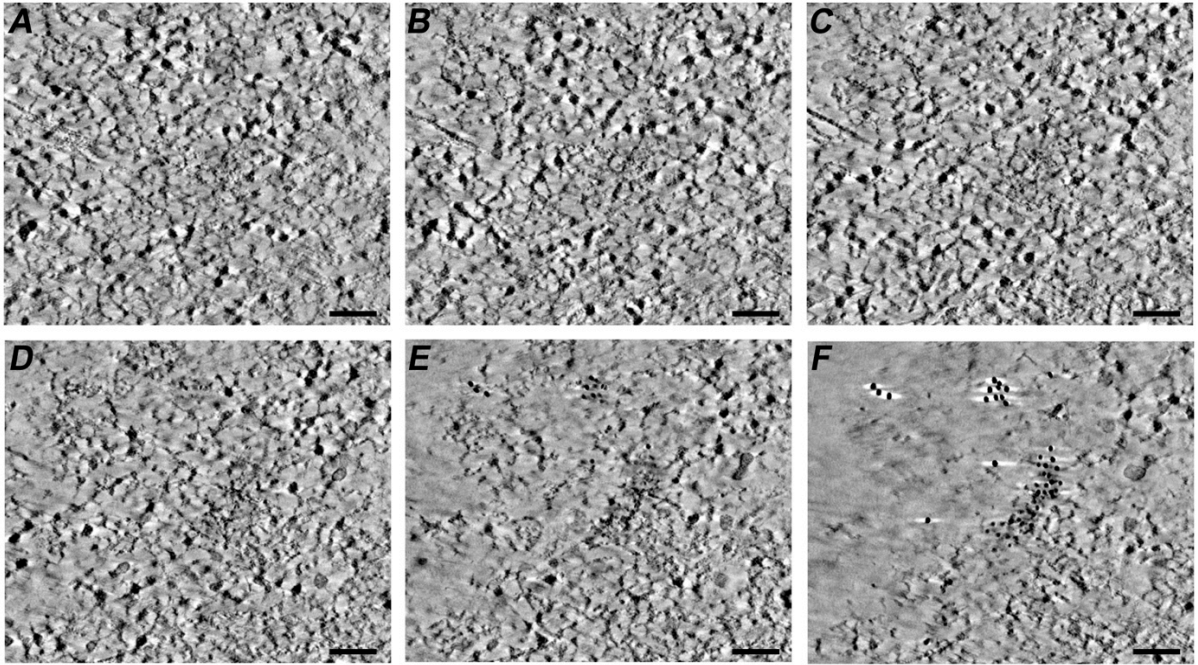

**Supplementary Figure S2:** Digital slices through the 3D density map of the human P-body “tomogram 2” presented in Figure 1C and D. Each digital slice corresponds to an average over 10

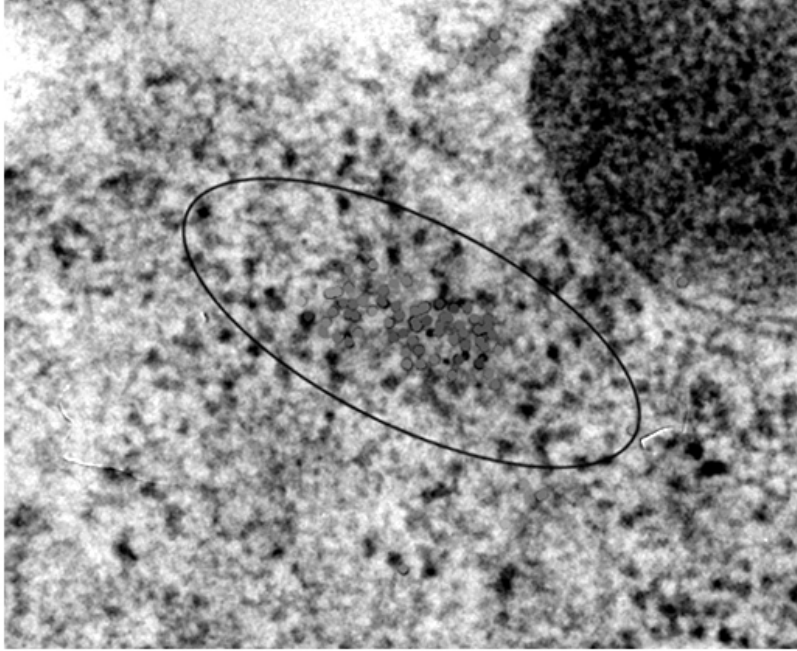

**Supplementary Figure S3:**

Schematic representation of the area defined as “close proximity” to the P-body on an image ( $0^\circ$ ) of the aligned tilted-series. An ellipsoid was drawn around the P-body the dimensions of this ellipsoid were then multiplied by a factor of two (solid line). Ribosomes (dark dense bodies) were counted inside and outside of this volume.
